# Supplementary material for: Bicontinuous hierarchical Na7V4(P2O7)4(PO4)/C nanorod–graphene composite with enhanced fast sodium and lithium ions intercalation chemistry
Source: Royal Society of Chemistry journal article supplement (doi:10.1039/c4ta04499a), 2014-01-01

## Supporting information

### **Bicontinuous Hierarchical Na<sub>7</sub>V<sub>4</sub>(P<sub>2</sub>O<sub>7</sub>)<sub>4</sub>(PO<sub>4</sub>)/C Nanorod- Graphene Composite with Enhanced Fast Sodium and Lithium Ions Intercalation Chemistry**

Sen Zhang<sup>1,\*</sup>, Chao Deng<sup>2,\*</sup>, Yu Meng<sup>1</sup>

<sup>1</sup> Key Laboratory of Superlight Material and Surface Technology, Ministry of Education, College of Material Science and Chemical Engineering, Harbin Engineering University, Harbin 150001, Heilongjiang, China

<sup>2</sup>Key Laboratory for Photonic and Electronic Bandgap Materials, Ministry of Education, College of Chemistry and Chemical Engineering, Harbin Normal University, Harbin 150025, Heilongjiang, China

#### **S1:**

Description of calculation process for apparent ion diffusion coefficients.

The ion diffusion coefficient can be calculated from the low frequency line according to the following equation:

$$D = R^2 T^2 / 2 A^2 n^4 F^4 C^2 \sigma^2 \quad (1)$$

Where  $R$  is the gas constant,  $T$  is the absolute temperature,  $A$  is the surface area of the electrode,  $n$  is the number of electrons per molecule during oxidation,  $F$  is the

Faraday constant,  $C$  is the concentration of ion,  $\sigma$  is the Warburg factor which is relative with  $Z'$ .

$$Z' = B + \sigma \omega^{-1/2} \quad (2)$$

Where  $B$  is a constant,  $\omega$  is the frequency. Based on the relationships between  $Z'$  and the reciprocal square root of frequency in the low frequency region, the ion diffusion coefficients are calculated.

**S2:** The relationship between  $Z'$  and  $\omega^{-1/2}$  of the low-frequency of the Nyquist plots for the  $\text{Na}_7\text{V}_4(\text{P}_2\text{O}_7)_4(\text{PO}_4)/\text{C}$  nanorod-graphene composite and the pristine  $\text{Na}_7\text{V}_4(\text{P}_2\text{O}_7)_4(\text{PO}_4)/\text{C}$  nanorod.

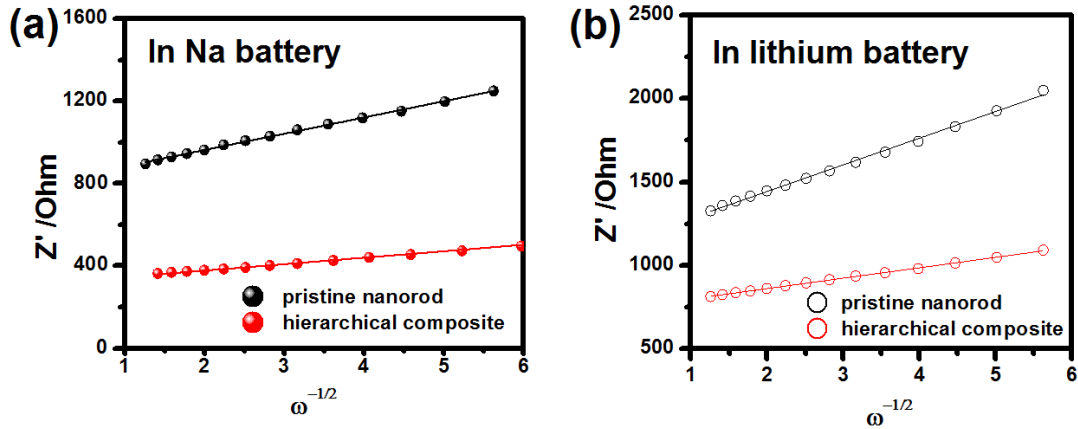

Supplement: c4ta04499a1.pdf [file c4ta04499a1.pdf]
